# Supplementary material for: Asymmetric plasmonic induced ionic noise in metallic nanopores
Source: Royal Society of Chemistry journal article supplement (doi:10.1039/c6nr01837h), 2016-01-01
Supplement: c6nr01837h1.pdf [file c6nr01837h1.pdf]

## Supporting Information

# Asymmetric Plasmonic Induced Ionic Noise in Metallic Nanopores

*Yi Li,<sup>a,b,†</sup> Chang Chen,<sup>a,c</sup> Kherim Willems,<sup>d,a</sup> Liesbet Lagae,<sup>a,c</sup> Guido Groeseneken,<sup>a,b</sup>*

*Tim Stakenborg,<sup>a</sup> and Pol Van Dorpe<sup>a,c</sup>*

a. imec, Kapeldreef 75, Leuven, B3001, Belgium.

b. Department of Electrical Engineering, KU Leuven, Kasteelpark Arenberg 10, 3001 Leuven, Belgium

c. Department of Physics and Astronomy, KU Leuven, Celestijnenlaan 200D, 3001 Leuven, Belgium

d. Department of Chemistry, KU Leuven, Celestijnenlaan 200G, 3001 Leuven, Belgium

E-mail: [yi.li@imperial.ac.uk](mailto:yi.li@imperial.ac.uk); [pol.vandorpe@imec.be](mailto:pol.vandorpe@imec.be) .

Present Address

<sup>†</sup> Experimental Solid State Group, Department of Physics, Imperial College London, London, SW7 2AZ, U.K.

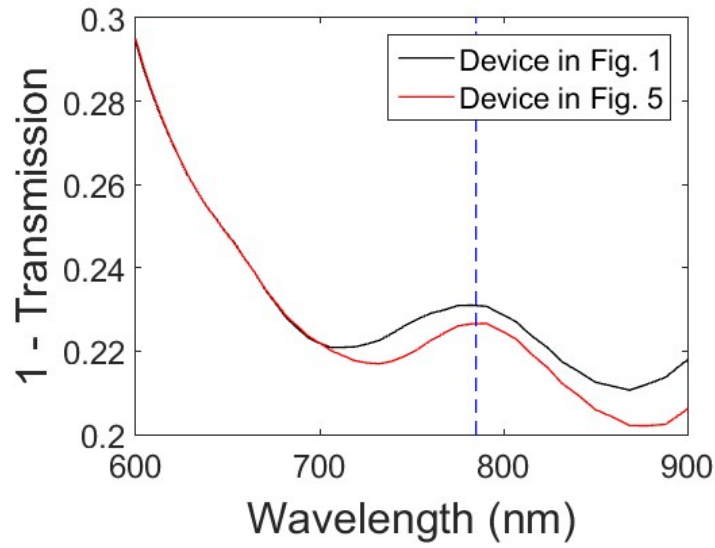

**Figure S1.** FDTD numerical simulation of the extinction results of nanopore devices in Figure 1 and 5. The dashed blue line indicates our laser excitation at 785 nm wavelength.

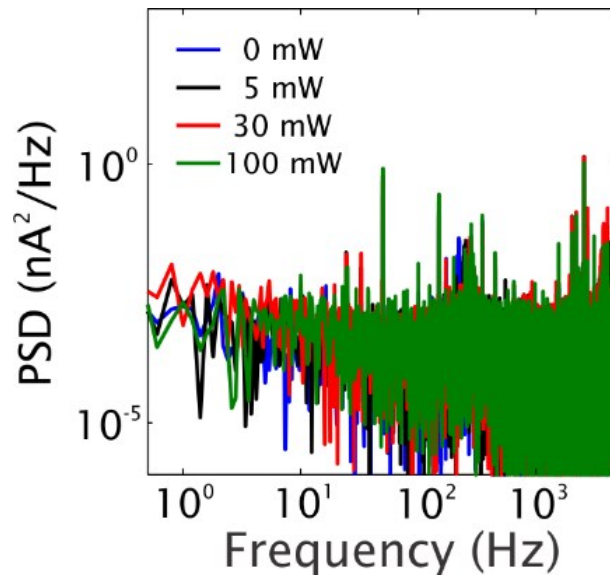

**Figure S2.** Laser noise measured by an ultra-high-speed photo-detector (Antel Optronics model AR-S2) at different laser powers.

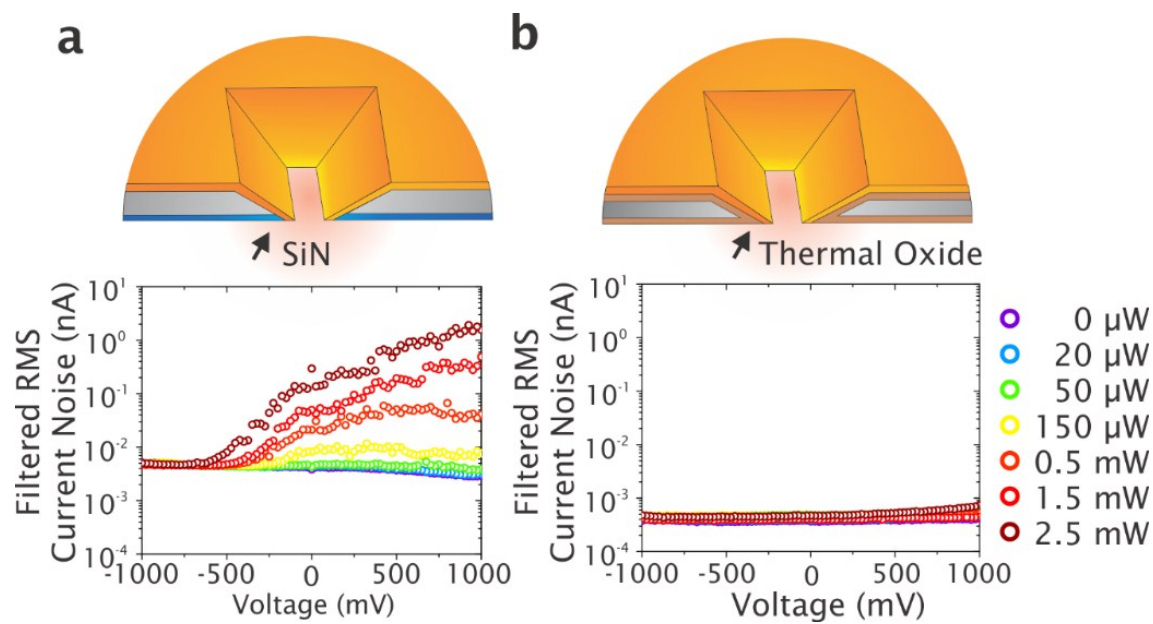

**Figure S3.** Current noise of gold nanocavities with different backside passivation methods.

(a) Filtered current noise versus bias voltage of a gold nanocavity with 50 nm PECVD SiN onto the backside. (b) Filtered current noise versus bias voltage of gold coated thermally oxidized nanocavity (thermal SiO<sub>2</sub> is about 77 nm thick). The band-pass filter was set from 50 Hz to 1 k Hz.
